# Supplementary material
Source: publisher site journal article supplement (https://www.dovepress.com/article/274968)
Supplement: Supplementary file 1 [file get_supplementary_file.php]

Supplementary materials


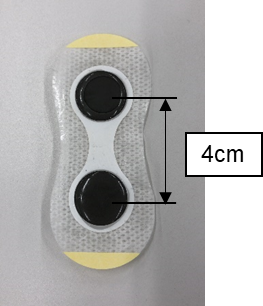


**Figure S2** Inner surface of electrode

holding sheet.

**Figure S1** Circuit diagram: The red and blue lines show the two pairs of electrodes with different carrier frequencies (2000 Hz or 2050 Hz).


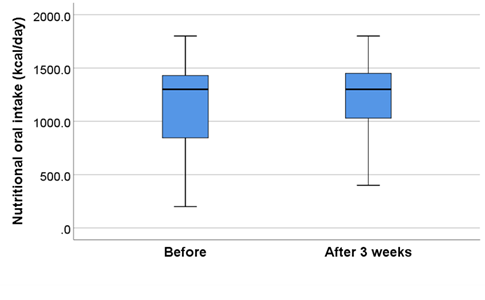


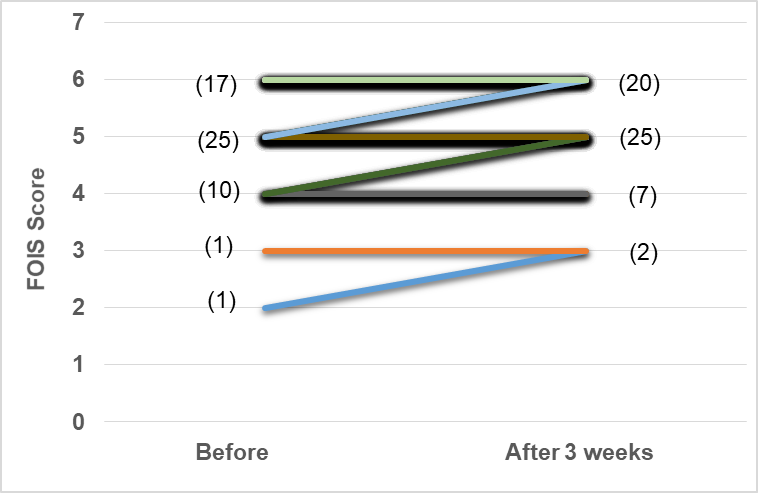


**Figure S3** Comparison of nutritional oral intake before and after the 3-week IFC-TESS

Notes: Data are presented as median and 25–75% IQR for the Wilcoxon signed-rank test (p < 0.001).

**Figure S4** Comparison of FOIS scores before and after 3-week IFC-TESS

Notes: Each number in the parentheses is the number of cases analyzed in the Wilcoxon signed-rank test (p = 0.02). The line colors are varied to make it easier to see the difference in scores.

Abbreviations: FOIS, functional oral intake scale
